# Supplementary material for: Divergent wiring of repressive and active chromatin interactions between mouse embryonic and trophoblast lineages
Source: PubMed Central journal article supplement (PMC6180096; doi:10.1038/s41467-018-06666-4), 2018-10-10
Supplement: 41467_2018_6666_MOESM3_ESM.pdf [file 41467_2018_6666_MOESM3_ESM.pdf]

## **Description of Additional Supplementary Files**

File Name: Supplementary Data 1

Description: List of external datasets used
